# Supplementary material
Source: PubMed Central journal article supplement (PMC7433030)

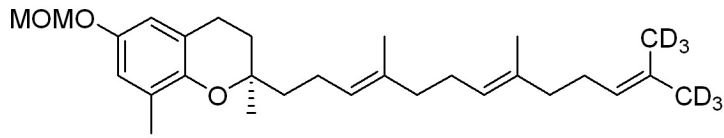

7.24  
6.67  
6.66  
6.59  
6.58  
5.12  
5.10  
5.09  
5.09  
5.08  
5.07  
5.06  
5.04

3.47  
3.46  
2.72  
2.71  
2.69  
2.13  
2.03  
1.97  
1.96  
1.58  
1.57  
1.56  
1.55

]]

]]

]]

]]

]]

]]

]]

]]

]]

]]

]]

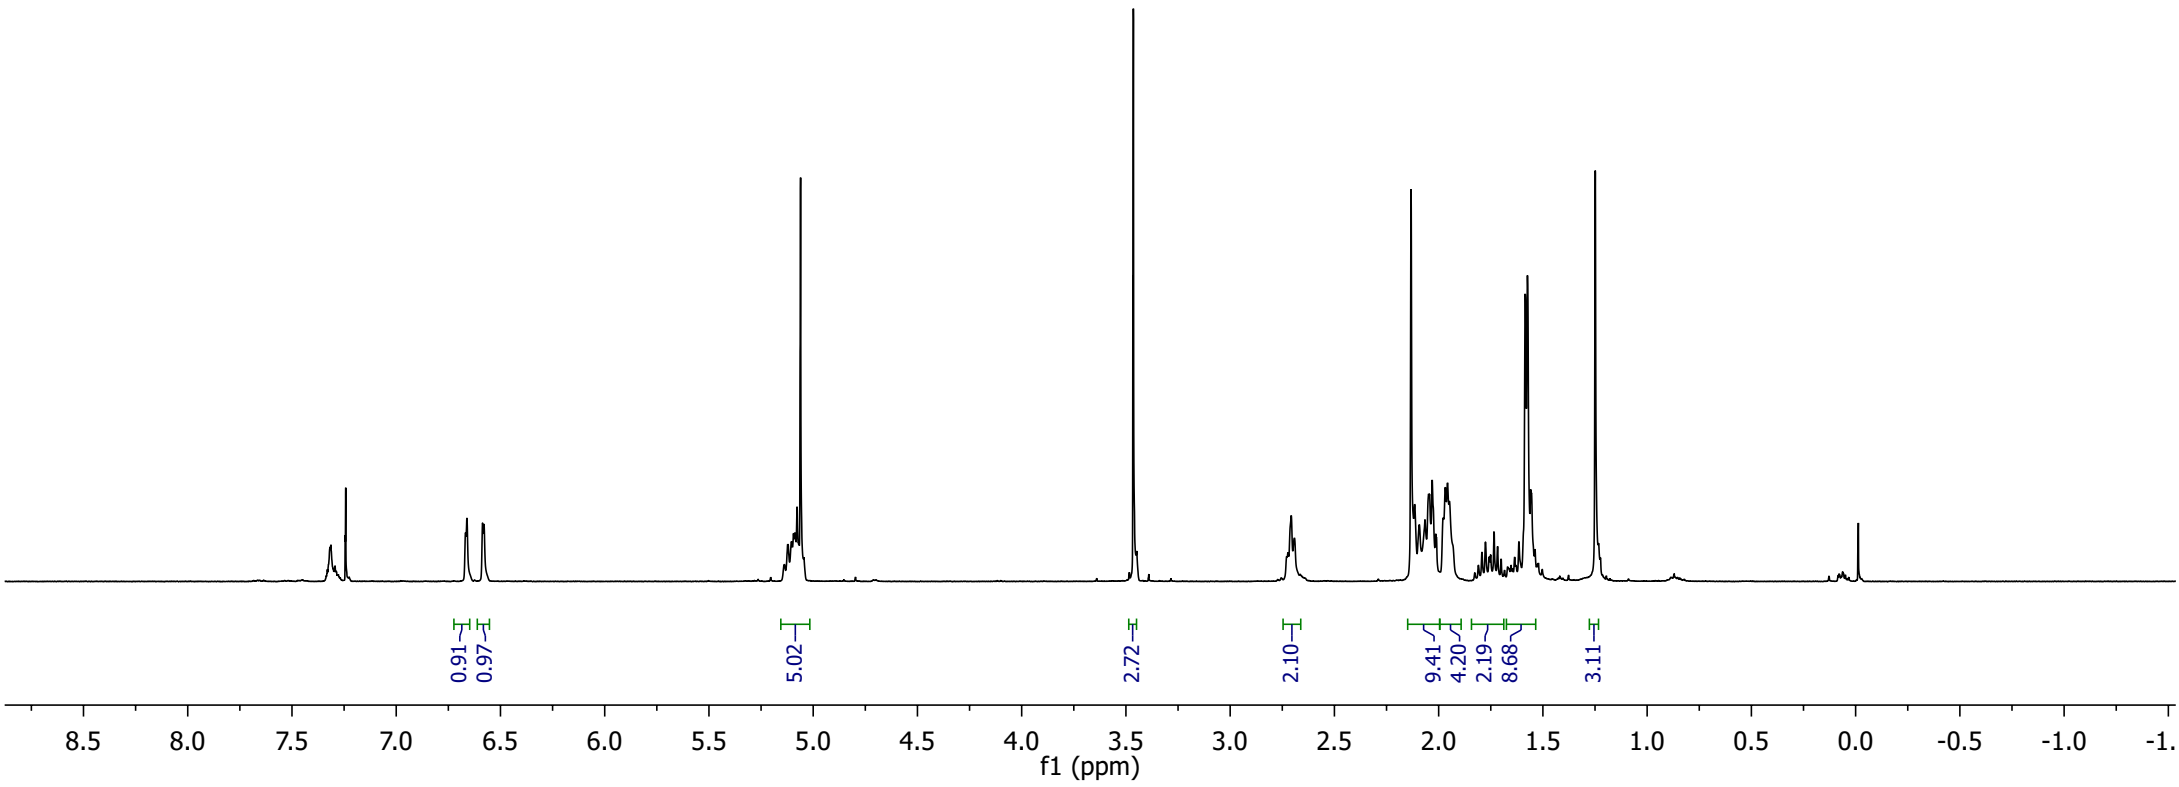



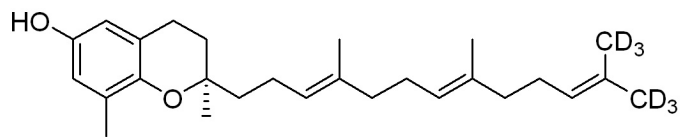

7.26  
 6.48  
 6.47  
 6.39  
 6.38  
 5.15  
 5.14  
 5.11  
 5.11  
 5.10  
 5.09  
 5.08  
 5.07  
 4.20  
 2.71  
 2.70  
 2.68  
 2.13  
 2.10  
 2.08  
 2.06  
 2.06  
 2.04  
 1.98  
 1.97  
 1.75  
 1.62  
 1.59  
 1.59  
 1.57  
 1.26  
 0.00

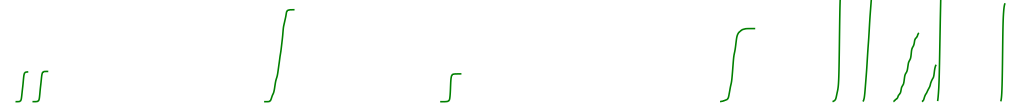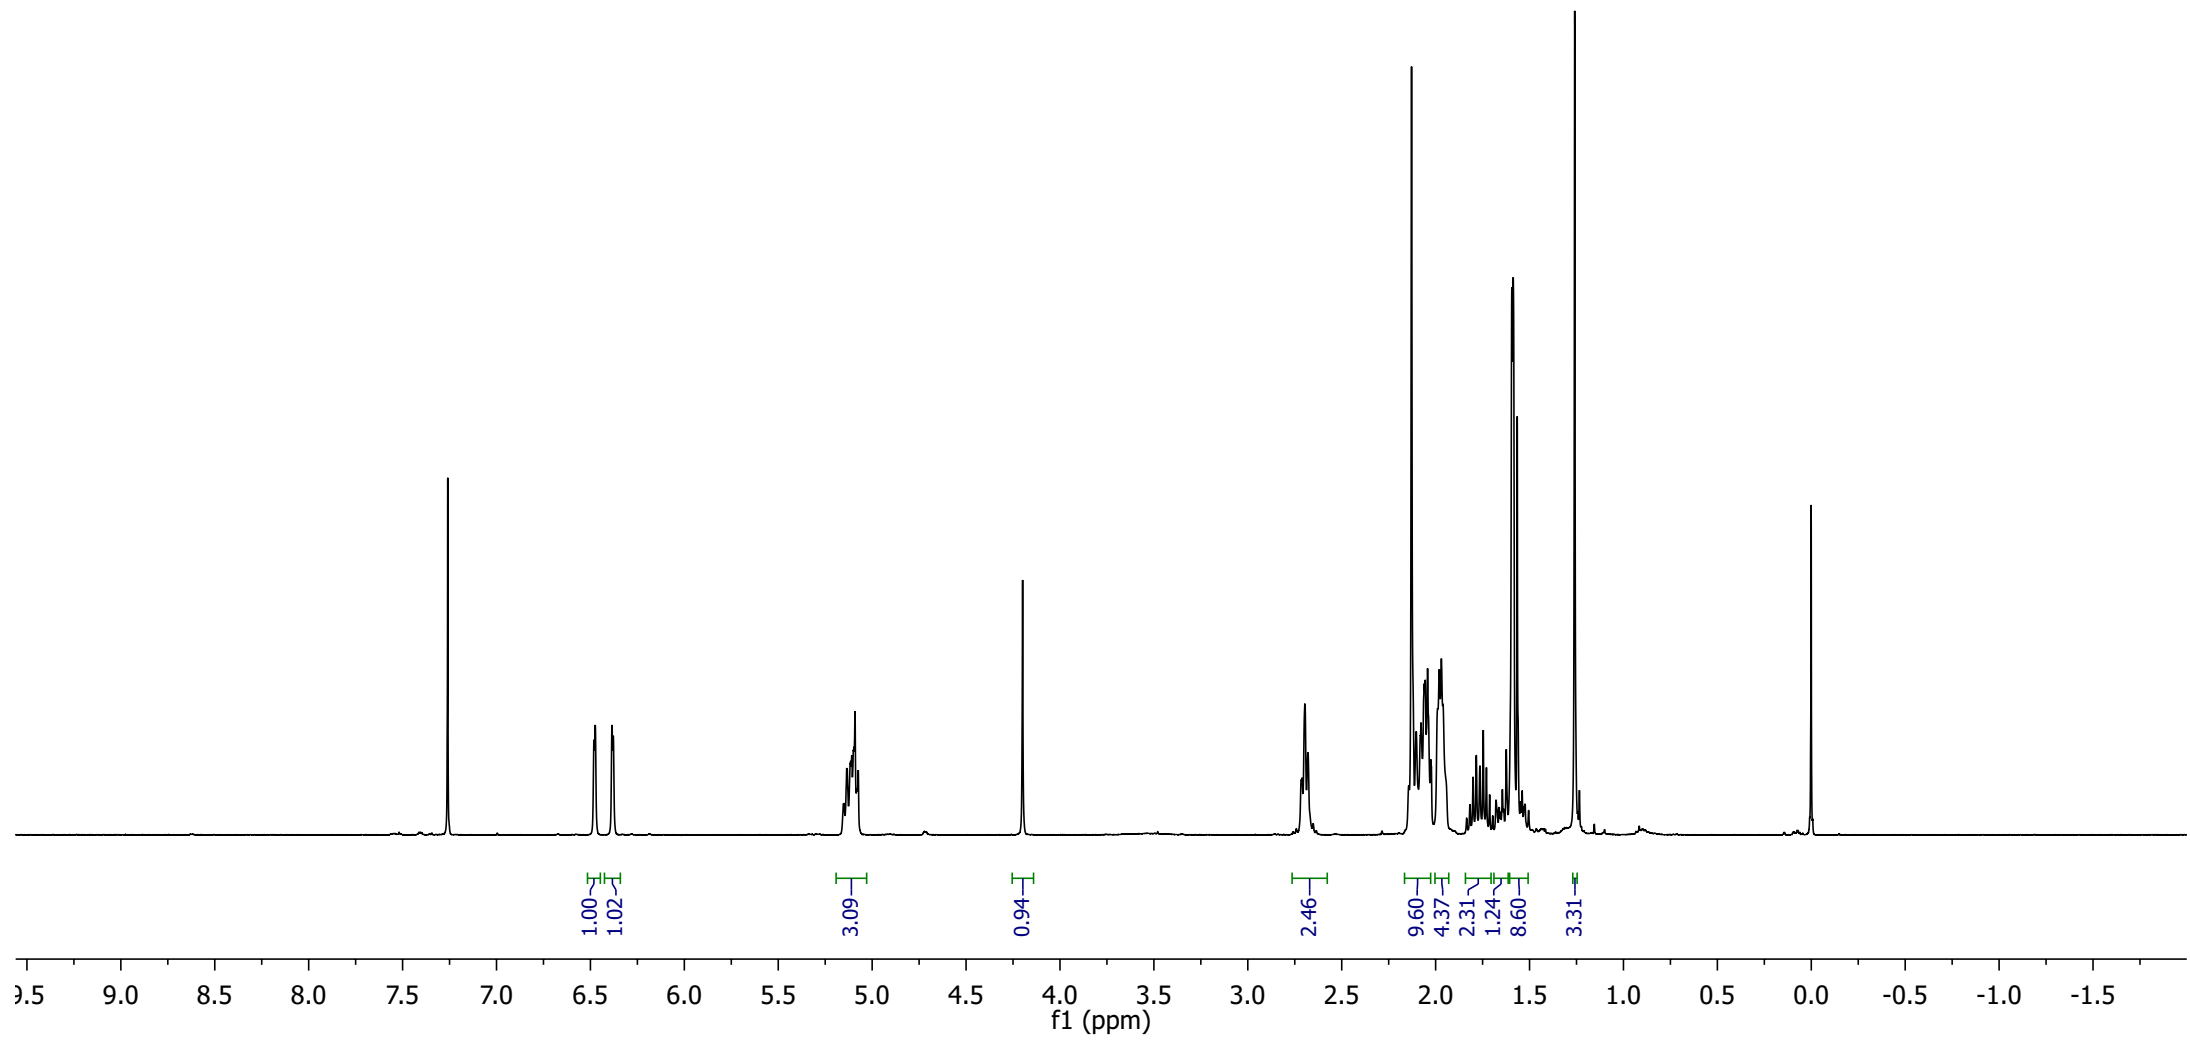

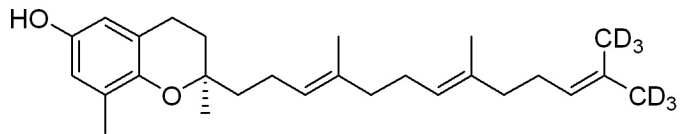

- 147.82
- 146.15
- 135.28
- 135.12
- 127.52
- 124.56
- 124.41
- 124.31
- 121.38
- 115.75
- 112.70
- 77.47
- 77.15
- 76.84
- 75.47
- 39.87
- 39.83
- 31.49
- 26.88
- 26.73
- 24.18
- 22.62
- 22.31
- 16.21
- 16.15
- 16.02
- 0.15

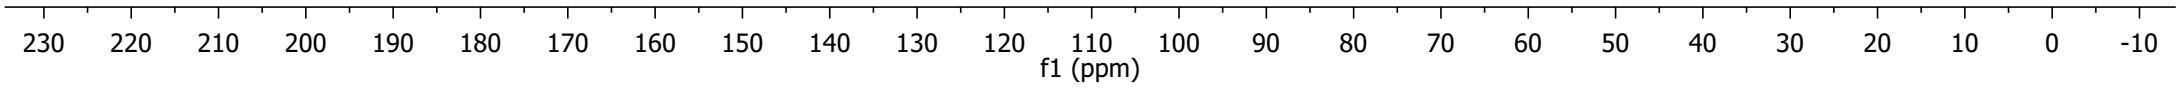

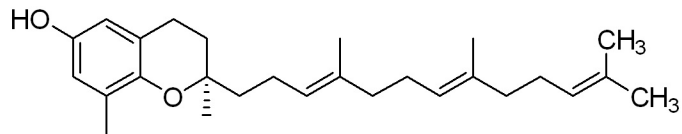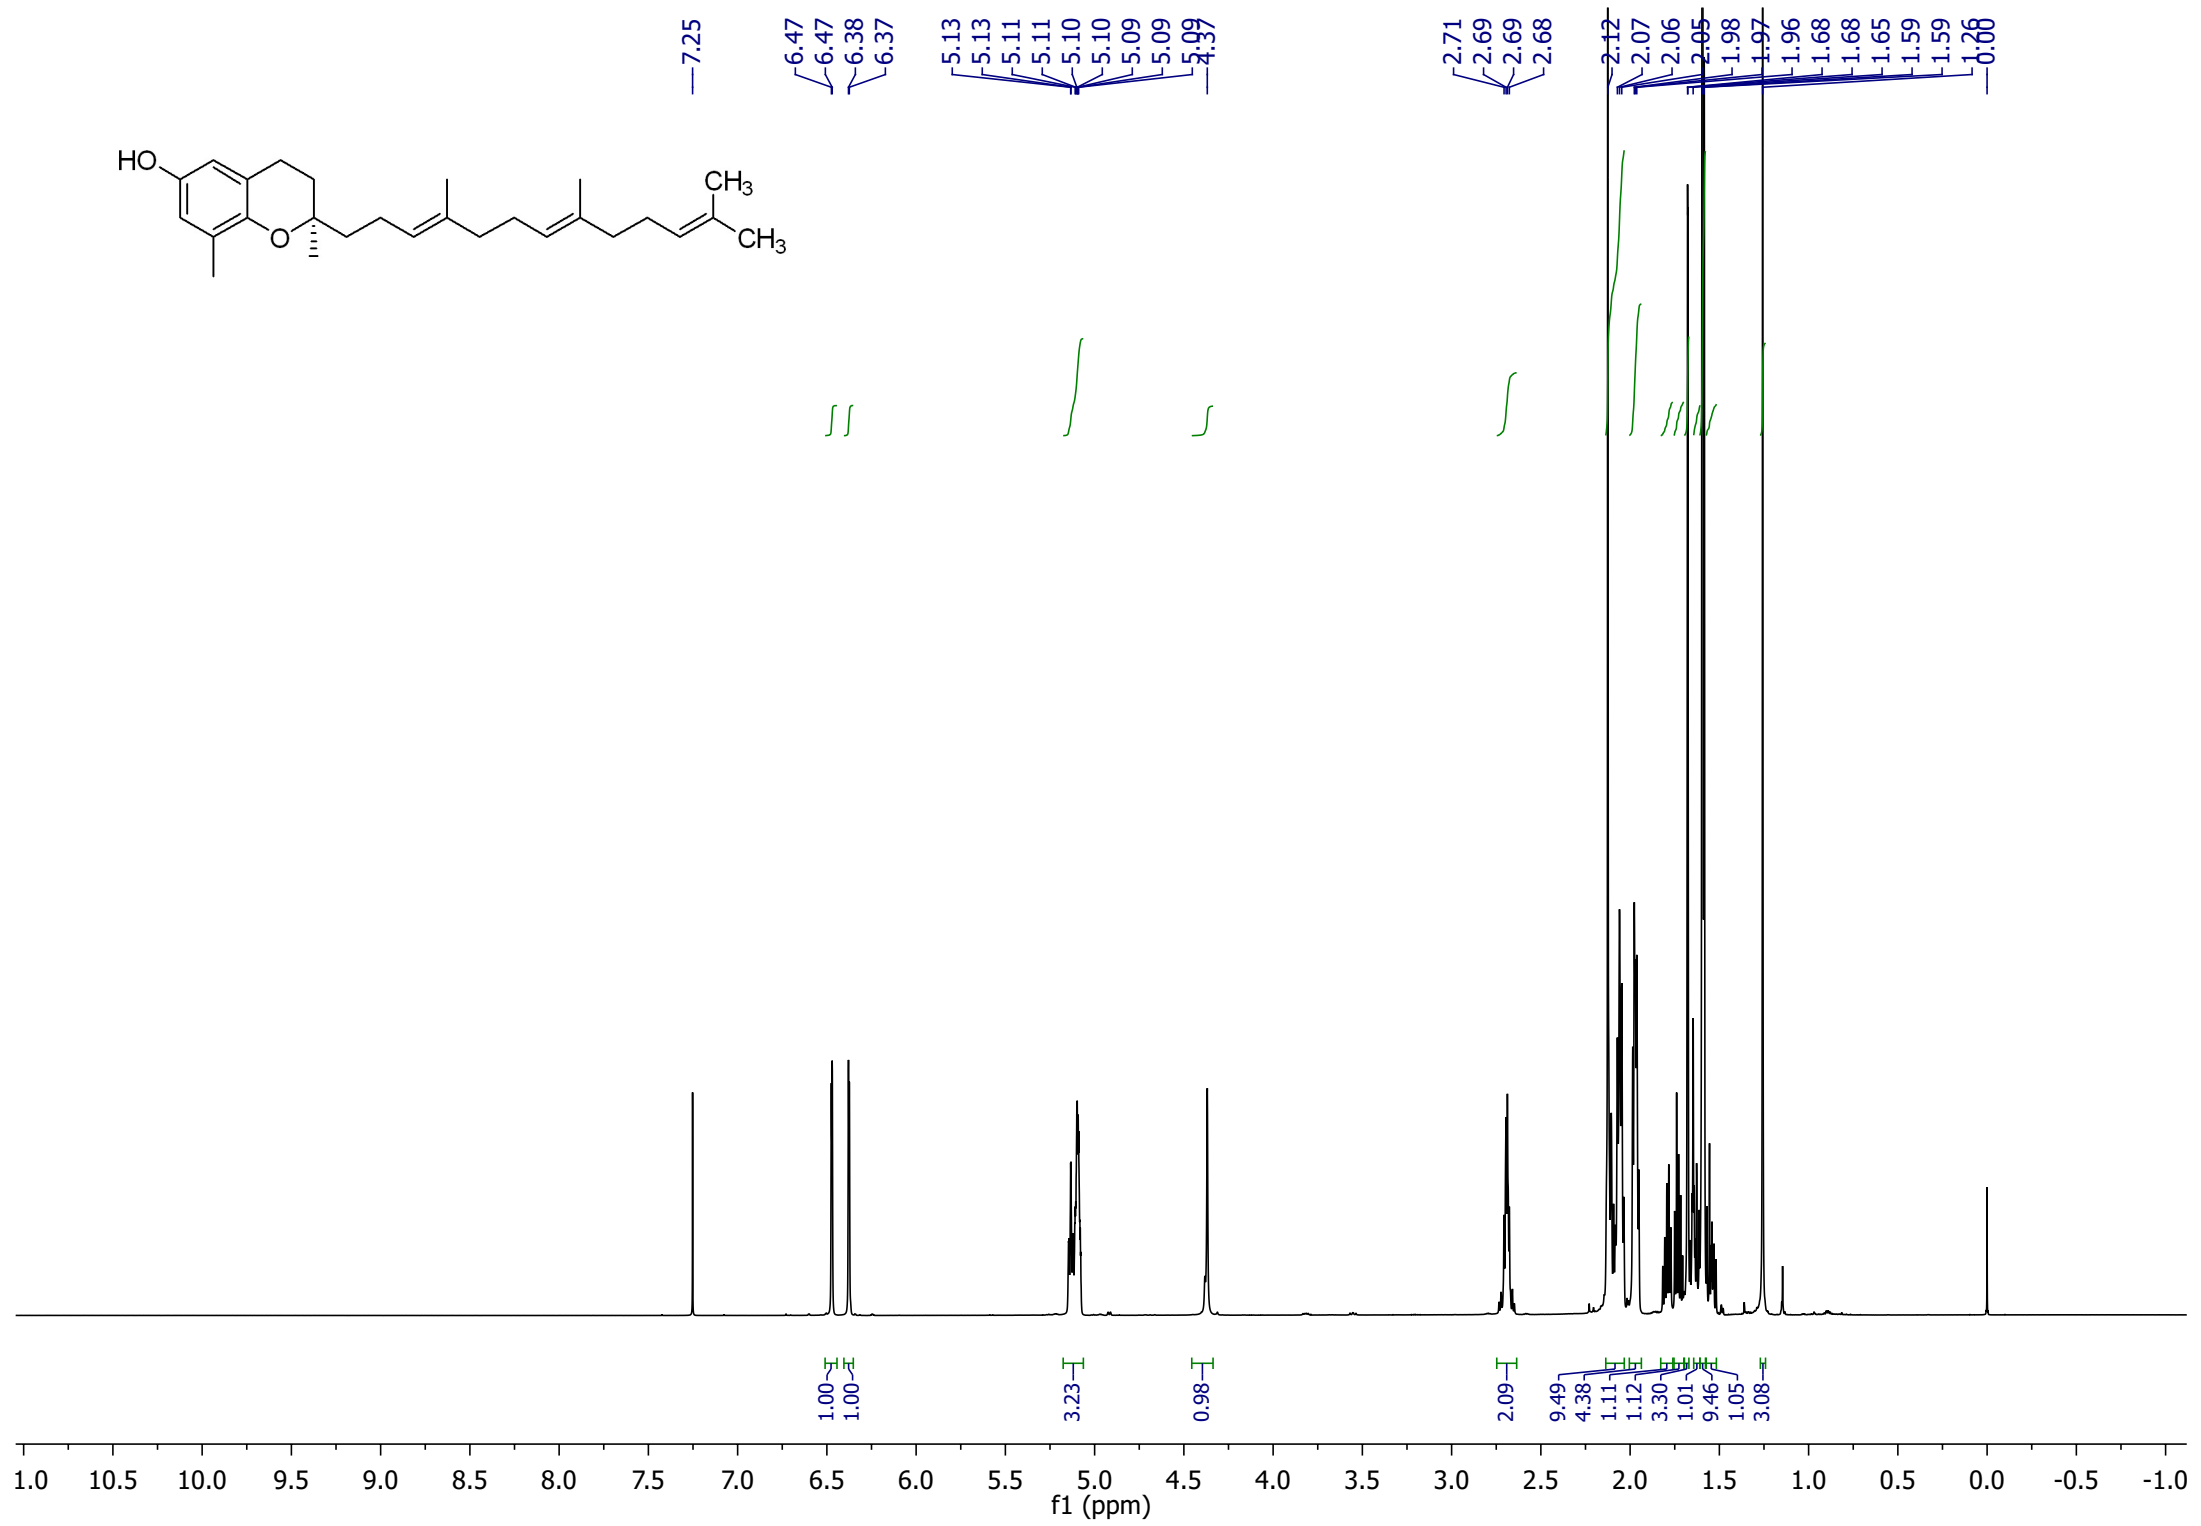

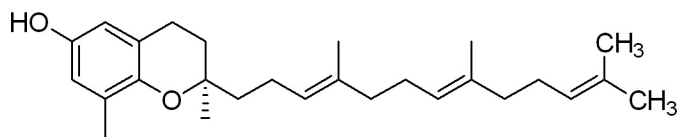

147.84  
146.13  
135.27  
135.11  
131.40  
127.51  
124.54  
124.42  
124.32  
121.38  
115.77  
112.72

77.37  
77.16  
76.95  
75.47

39.85  
39.82  
31.49  
26.89  
26.72  
25.84  
24.16  
22.61  
22.30  
17.82  
16.19  
16.14  
16.01

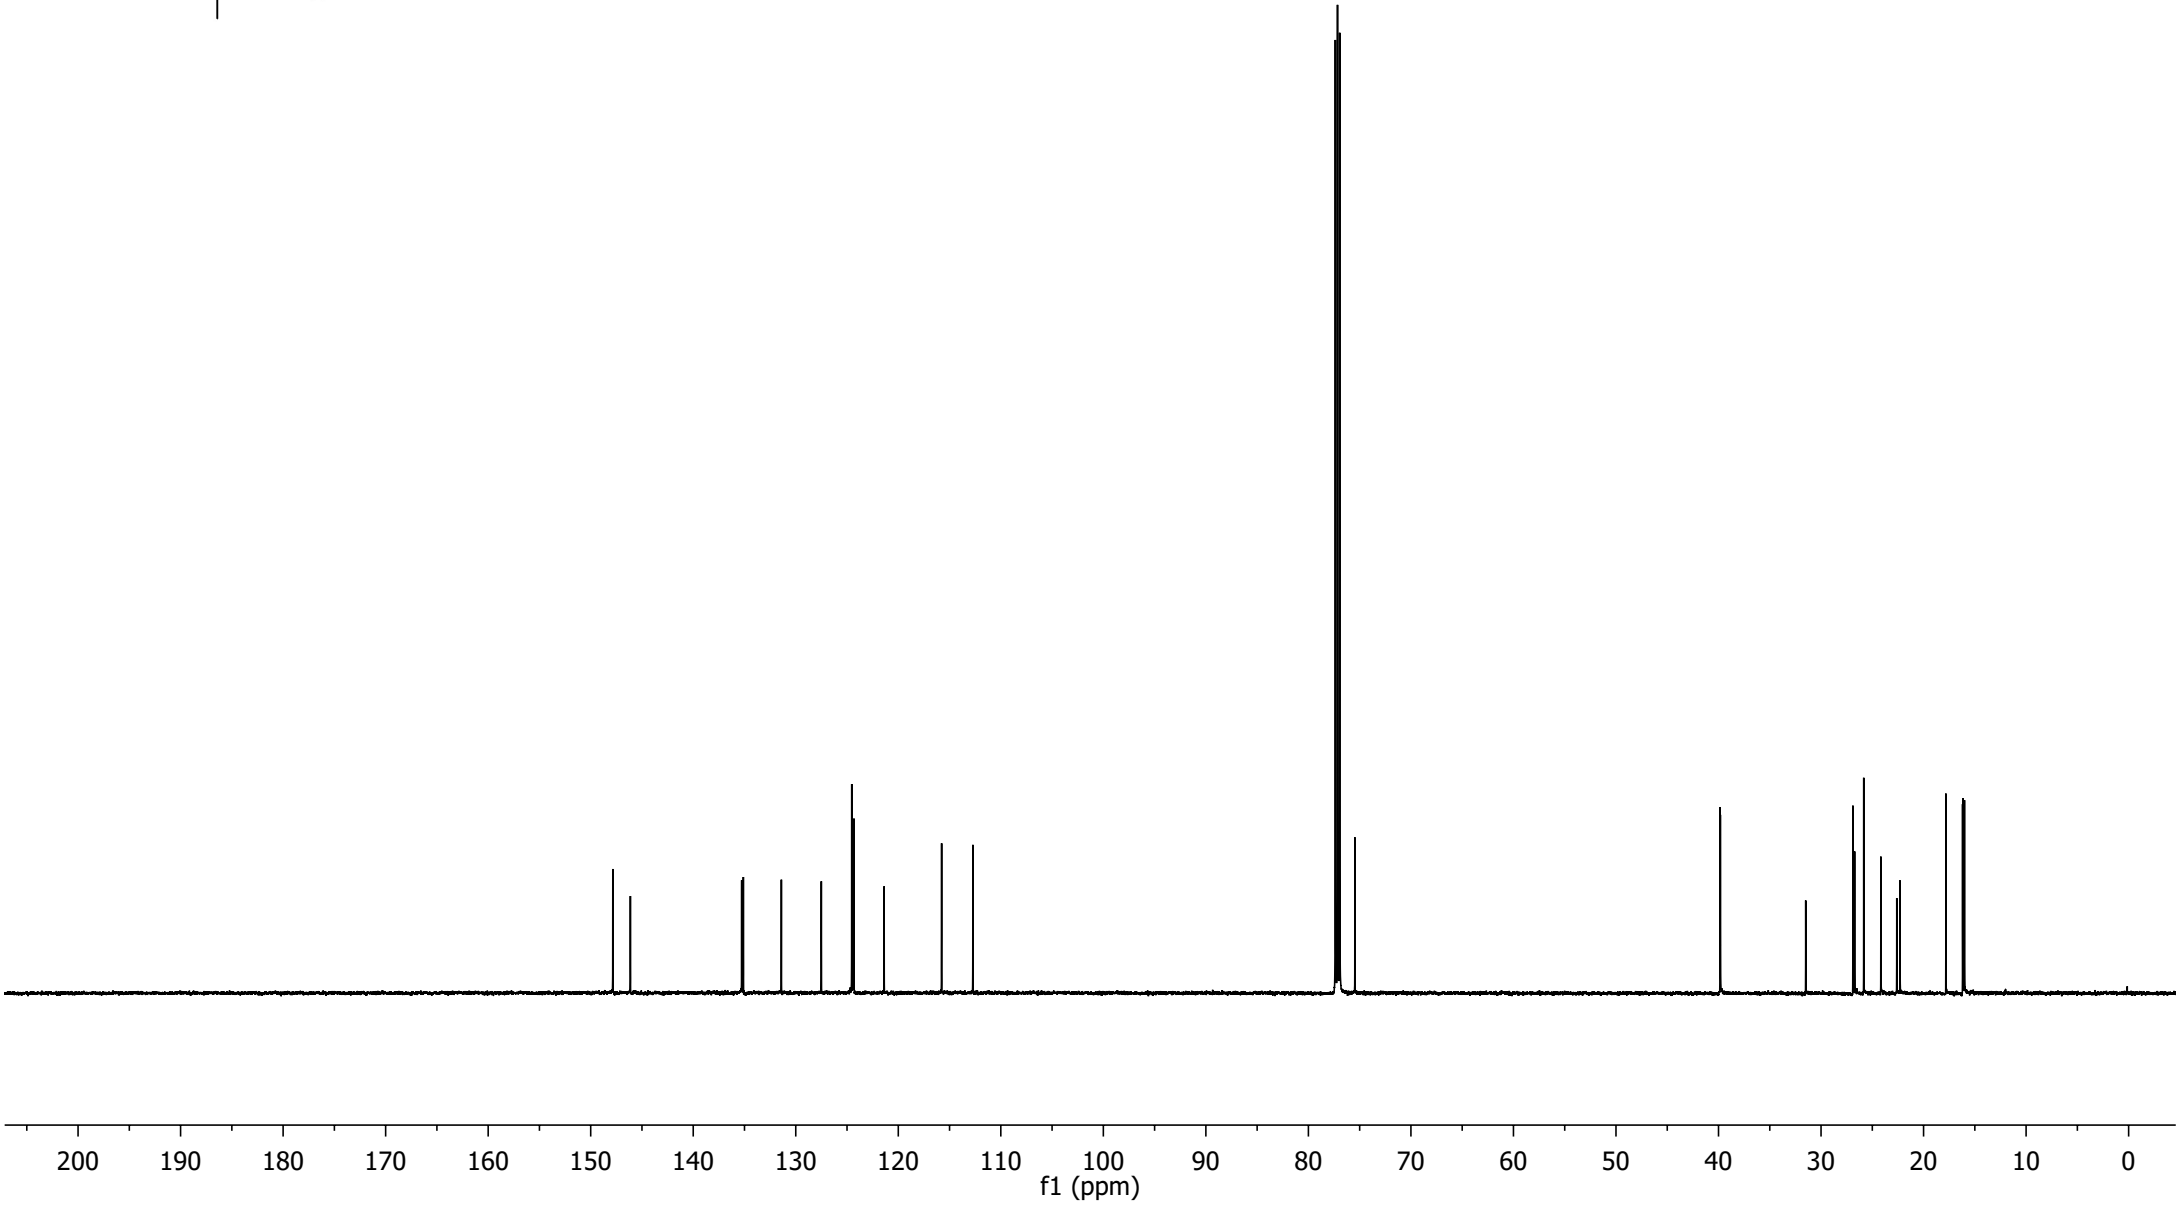

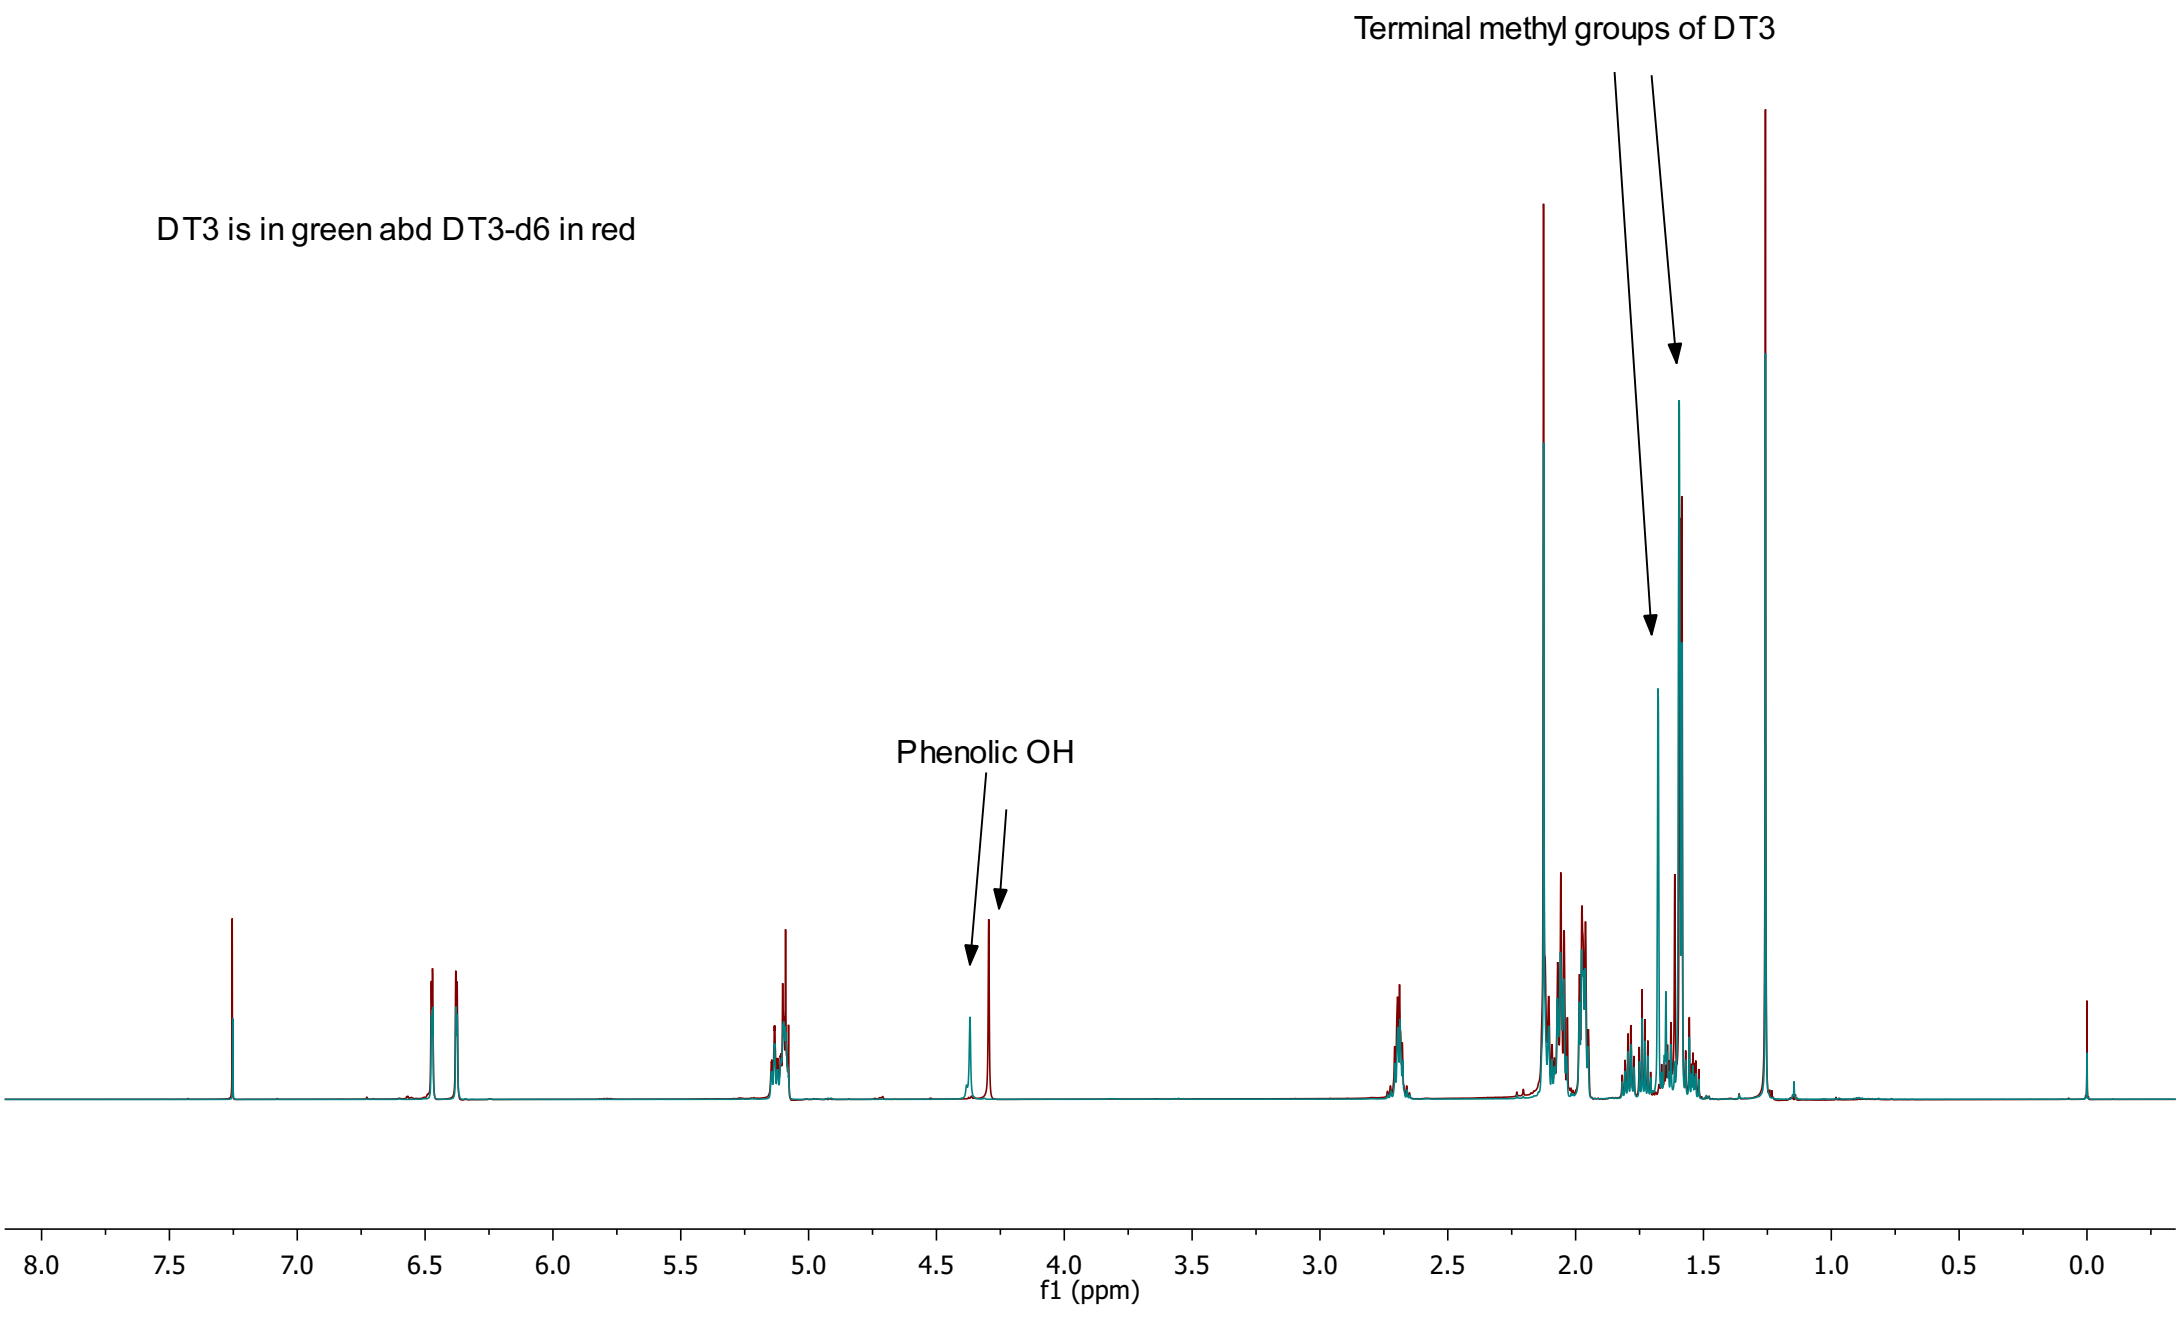

DT3 is in green abd DT3-d6 in red

Terminal methyl groups of DT3

Phenolic OH

8.0 7.5 7.0 6.5 6.0 5.5 5.0 4.5 4.0 3.5 3.0 2.5 2.0 1.5 1.0 0.5 0.0  
f1 (ppm)

DT3 is in red and DT3-d6 in green

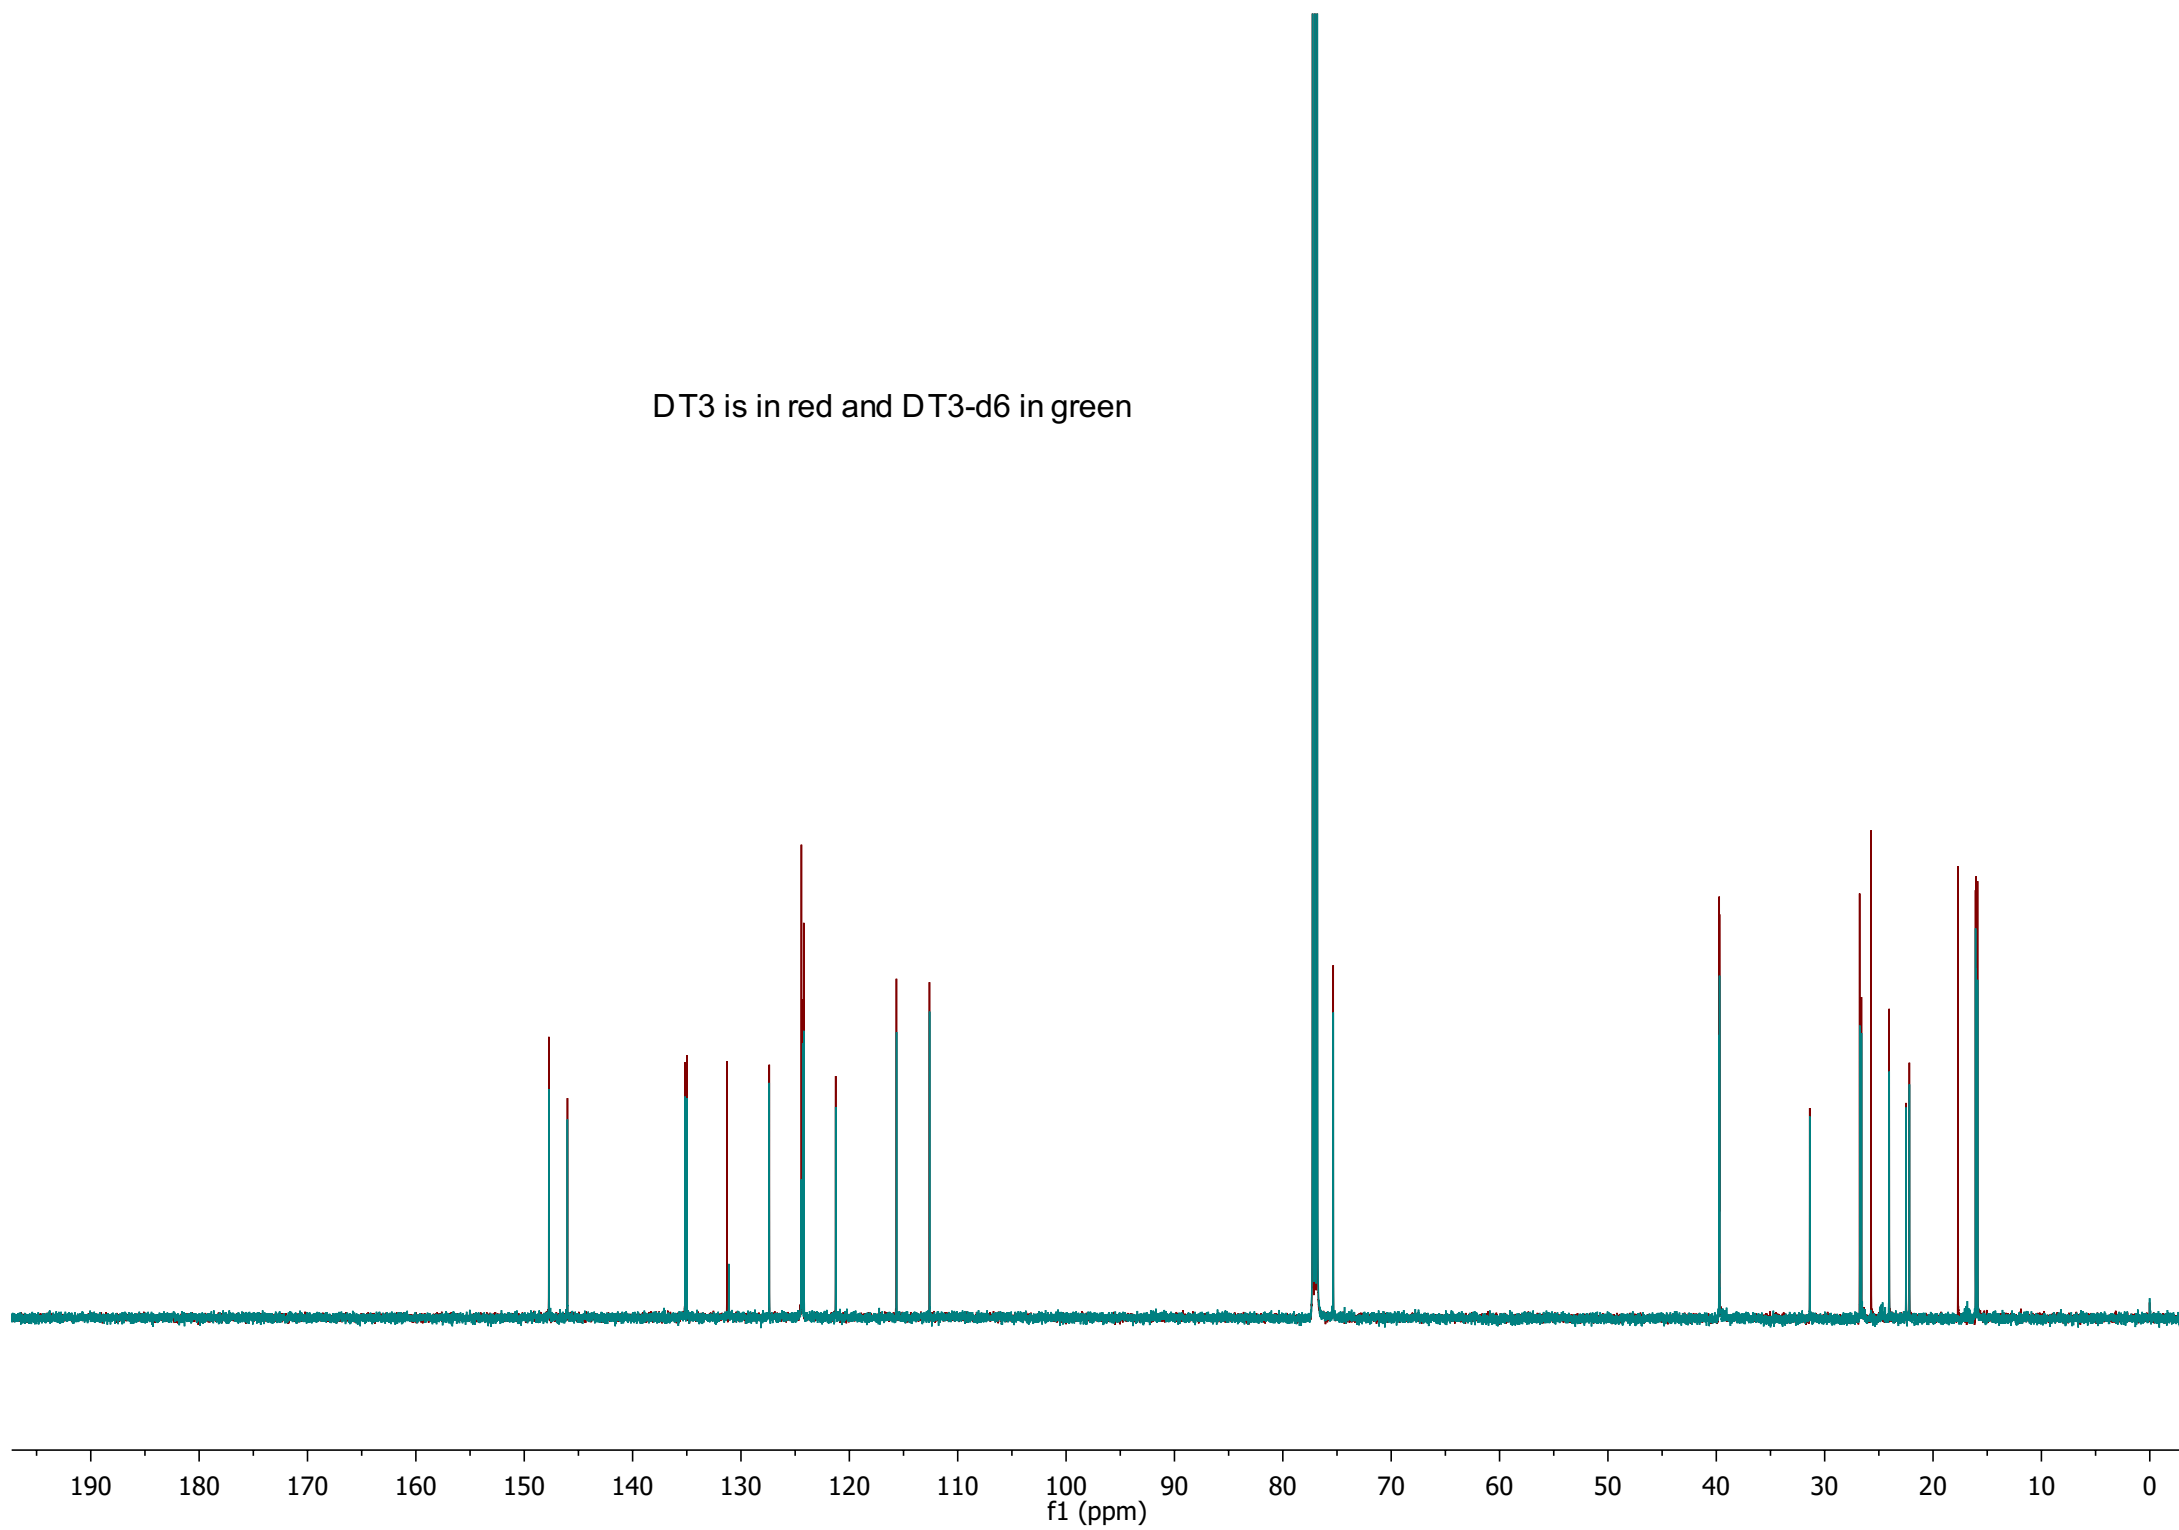

Supplement: NIHMS1584144-supplement-1.pdf [file NIHMS1584144-supplement-1.pdf]
